# Supplementary material
Source: PubMed Central journal article supplement (PMC7810032)
Supplement: mmc1.pdf [file mmc1.pdf]

## **Supplementary Materials**

### **Multi-classifier-based Identification of COVID-19 from Chest CT using Generalizable and Interpretable Radiomics Features**

#### *Appendix A: CT scanning parameters*

In the study population, patients from the hospitals in China were imaged with a CT slice of 1-mm thickness on a GE Revolution 256 scanner (GE Medical Systems, Waukesha, USA), or imaged with a CT slice of 5-mm thickness on a NeuViz 128 scanner (Neusoft, Shenyang, China), or with a CT slice of 5-mm thickness on a NeuViz 64 scanner (Neusoft, Shenyang, China).

CT scans of the patients from the hospital from the United States were obtained at 1-3 mm slice thickness with or without contrast (Lightspeed VCT and Revolution, GE Healthcare, Milwaukee, WI; Aquilion, Toshiba Medical Systems, Otawara, Japan; SOMATOM, Siemens Healthineers, Erlangen, Germany). CT images were reviewed by radiologists at each center having more than ten years of individual experience.

*Appendix B: Samples of the manually segmentation of pneumonia lesions*

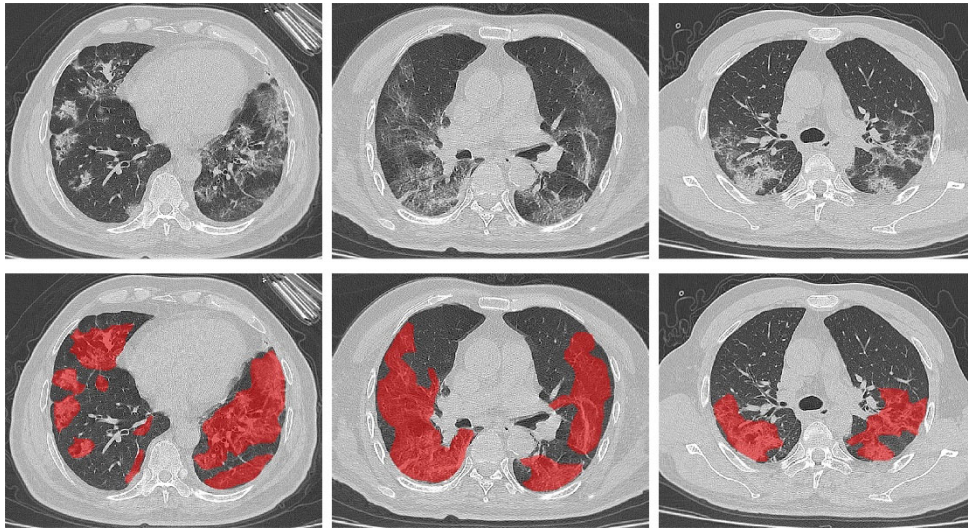

**Figure S1.** The mask of the region of interest of SARS-CoV-2 positive pneumonia lesions which manually segmented by radiologists. The three CT slices were from different patients.

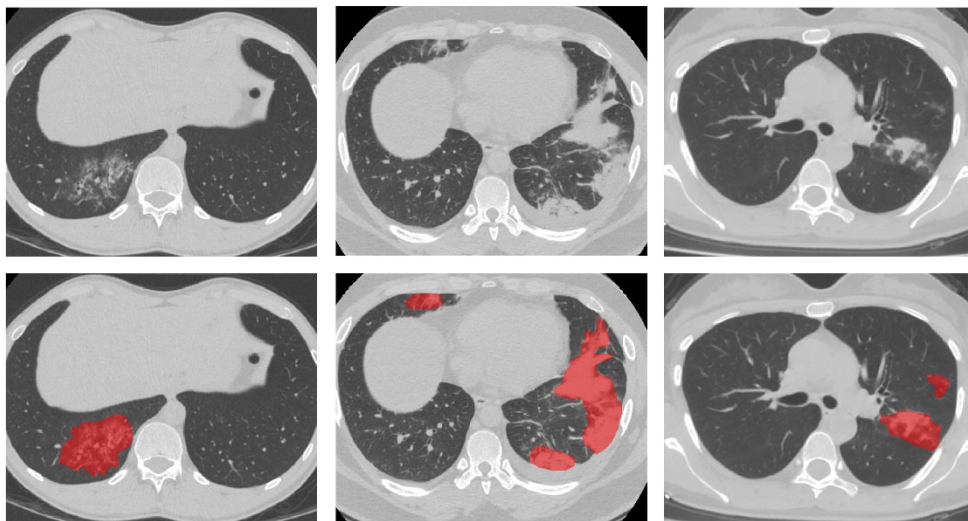

**Figure S2.** The mask of the region of interest of SARS-CoV-2 negative pneumonia lesions which manually segmented by radiologists. The three CT slices were from different patients.

**Appendix C: Selected significant radiomics features by each classifier**

*Lasso Classifier = 3.653673*

*+ 4.958981e-03 \* diagnostics\_Image-original\_Mean +*  
*-4.263274e-05 \* diagnostics\_Image-original\_Minimum +*  
*3.322157e-01 \* diagnostics\_Mask-original\_VolumeNum +*  
*3.989302e-03 \* original\_shape\_MajorAxisLength +*  
*1.870174e-03 \* original\_shape\_Maximum2DDiameterColumn +*  
*-1.788563e-02 \* original\_shape\_SurfaceVolumeRatio +*  
*-1.297587e-04 \* original\_firstorder\_RootMeanSquared +*  
*2.658778e-01 \* original\_firstorder\_Skewness +*  
*-1.333541e+01 \* original\_firstorder\_Uniformity +*  
*1.022123e-03 \* original\_glcM\_Contrast +*  
*1.067405 \* original\_gldm\_DependenceNonUniformityNormalized +*  
*-7.053722 \* original\_gldm\_LowGrayLevelEmphasis +*  
*2.146219e-05 \* original\_gldm\_SmallDependenceHighGrayLevelEmphasis +*  
*-7.310696 \* original\_gldm\_SmallDependenceLowGrayLevelEmphasis +*  
*-1.707699e-01 \* original\_glrIm\_ShortRunLowGrayLevelEmphasis +*  
*-6.043230e-05 \* original\_glszm\_LargeAreaHighGrayLevelEmphasis +*  
*-8.216791e-01 \* original\_ngtdm\_Busyness*

**Linear classifier ( $p < 0.0001$ ):**

[1] diagnostics\_Image-original\_Mean

- [2] diagnostics\_Mask-original\_VoxelNum
- [3] diagnostics\_Mask-original\_VolumeNum
- [4] original\_shape\_Maximum2DDiameterSlice
- [5] original\_shape\_MeshVolume
- [6] original\_shape\_Sphericity
- [7] original\_shape\_SurfaceArea
- [8] original\_firstorder\_Entropy
- [9] original\_firstorder\_InterquartileRange
- [10] original\_firstorder\_MeanAbsoluteDeviation
- [11] original\_firstorder\_Minimum
- [12] original\_firstorder\_RobustMeanAbsoluteDeviation
- [13] original\_firstorder\_RootMeanSquared
- [14] original\_glcm\_DifferenceEntropy
- [15] original\_glcm\_Id
- [16] original\_glcm\_Idm
- [17] original\_glcm\_Imc2
- [18] original\_glcm\_InverseVariance
- [19] original\_glcm\_JointAverage
- [20] original\_glcm\_SumEntropy
- [21] original\_gldm\_DependenceEntropy
- [22] original\_gldm\_GrayLevelNonUniformity
- [23] original\_gllm\_GrayLevelNonUniformity

- [24] original\_grlm\_RunEntropy
- [25] original\_glszm\_GrayLevelNonUniformity
- [26] original\_firstorder\_Uniformity

***Least absolute shrinkage and selection operator ( $\lambda$ .min):***

- [1] diagnostics\_Image-original\_Mean
- [2] diagnostics\_Image-original\_Minimum
- [3] diagnostics\_Mask-original\_VolumeNum
- [4] original\_shape\_MajorAxisLength
- [5] original\_shape\_Maximum2DDiameterColumn
- [6] original\_shape\_SurfaceVolumeRatio
- [7] original\_firstorder\_RootMeanSquared
- [8] original\_firstorder\_Skewness
- [9] original\_firstorder\_Uniformity
- [10] original\_glcm\_Contrast
- [11] original\_gldm\_DependenceNonUniformityNormalized
- [12] original\_gldm\_LowGrayLevelEmphasis
- [13] original\_gldm\_SmallDependenceHighGrayLevelEmphasis
- [14] original\_gldm\_SmallDependenceLowGrayLevelEmphasis
- [15] original\_grlm\_ShortRunLowGrayLevelEmphasis
- [16] original\_glszm\_LargeAreaHighGrayLevelEmphasis
- [17] original\_ngtdm\_Busyness

***Random forest (Top-20 features of significance):***

1. diagnostics\_Image-original\_Mean
2. original\_glrlm\_ShortRunLowGrayLevelEmphasis
3. original\_glrlm\_LowGrayLevelRunEmphasis
4. original\_gldm\_LowGrayLevelEmphasis
5. original\_glszm\_LowGrayLevelZoneEmphasis
6. original\_shape\_Maximum2DDiameterSlice
7. original\_firstorder\_Median
8. original\_shape\_Maximum3DDiameter
9. original\_shape\_MajorAxisLength
10. original\_ngtdm\_Coarseness
11. original\_gldm\_LargeDependenceHighGrayLevelEmphasis
12. diagnostics\_Image-original\_Maximum
13. original\_firstorder\_RootMeanSquared
14. diagnostics\_Image-original\_Minimum
15. original\_shape\_Maximum2DDiameterColumn
16. original\_glszm\_ZoneVariance
17. original\_firstorder\_10Percentile
18. original\_firstorder\_Uniformity
19. diagnostics\_Mask-original\_VolumeNum
20. original\_firstorder\_Minimum

#### ***Appendix D: The procedure of radiomics model training by LASSO***

The R language was used to construct the LASSO radiomics classifier based on the features extracted by Pyradiomics, and the construction of other classifiers is similar to this process. First, we input the COVID-19 status of each image (1 meant positive and 0 meant negative) and the corresponding 120-dimensional radiomics feature of each image into R. Then, the "glmnet" and "cv.glmnet" functions were used to obtain the coefficients of each feature by LASSO classifier and the final LASSO model, respectively. Finally, the LASSO radiomics model was further tested.

The above-mentioned well-trained LASSO radiomics model is included as supplementary study data. Please use the command "load()" to reuse the model. The source code of this algorithm is shown below.

```
y<- TrainData$COVID_Status

TrainData_Feature_Lasso <- TrainData$Feature

names(TrainData_Feature_Lasso) <- NULL

TrainData_Feature_Lasso <-data.matrix(TrainData_Feature_Lasso)

fit<-glmnet(TrainData_Feature_Lasso,y,alpha=1,family='binomial')

cv.fit<-cv.glmnet(TrainData_Feature_Lasso,y,family="binomial")

Test <-predict(fit,type="response",newx = Test_Feature,s=cv.fit$lambda.1se)

Roc_Test<-roc(TestData$COVID_Status, Test)

auc(Roc_Test)
```
